# Supplementary material for: Metagenomic Analysis of Surface Waters and Wastewater in the Colombian Andean Highlands: Implications for Health and Disease
Source: Springer Nature journal article supplement (doi:10.1007/s00284-024-04019-7), 2025-02-28
Supplement: MOESM1 [file 284_2024_4019_MOESM1_ESM.pdf]

# Current Microbiology

## AUTHOR'S CHECKLIST FOR MANUSCRIPT SUBMISSION

**A copy of this checklist should accompany each submitted paper.**

**Your manuscript must be prepared according to the Instructions for Authors which are available online and accessible [here](#).**

### General

☒ **At least the corresponding author has read carefully the Instruction for Authors guide.**

☒ All authors have read the submitted version of the paper AND have approved its Submission.

☒ All authors' names have been provided as 'full first name, (middle initial), full last name'

☒ All authors have double checked their affiliation (with precise location).

☒ The contact information for the corresponding author(s) is as follows:

- Provided an Institutional email/ORCID number whenever possible
- Institutional phone number

☒ All text, including abstract, tables, references, footnotes and figure legends, is double-spaced printed. All lines and pages are numbered.

### Compliance with ethical standards

☒ Authors' contribution statement has been included.

☒ A disclosure of potential conflict of interest has been included.

☐ Ethical approval for research involving human participants and/or animals: if applicable

☐ Informed consent has been provided: if applicable (human participants)

### Abstract

☒ The abstract is clear and concise and summarizes the content of the paper without presenting extensive experimental details.

- Length (250 words max)
- Structure: one paragraph without subheadings
- Keywords (5-7)

### Manuscript

☒ The English language usage has been checked by a fluent English speaker and/or a professional language editing service.

☐ The length of the manuscript is according to Instruction for authors taking into account the article type.

☒ Abbreviations are defined at first mentioning.

☐ Figures have been submitted electronically separately from the main manuscript file, at high resolution and preferentially in TIFF or EPS.

☒ Figure captions summarize the result or major of the data you are presenting in the figure with a brief description of the methods necessary to understand the figure without having to refer to the main text.

- ☒ The submission has no more than five main figures with up to four panels each (Original paper) or up to two figures with up to four panels each (Short Communications).
- ☒ Reference formatting is according to the formatting outlined in the instructions for authors.
- ☐ The number of references is according to the article type.

### **Data**

- ☐ Raw data/original images of uncropped and non-adjusted gels/blots should be available to be provided as supporting material upon request.
- ☒ The sequence accession number(s) have been provided at the end of Material & Methods section.

### **New taxa**

- ☐ The type strains for new taxa have been deposited in at least two different culture collections
- ☐ Full (required for prokaryotes) or draft genome sequencing data is provided.

for fungi see: <https://doi.org/10.1186/s43008-021-00063-1>

for prokaryotes see: <https://doi.org/10.1099/ijsem.0.000778>

### **Microbial isolates**

- ☐ Microbial isolates should be correctly identified and characterized using molecular methods.
- ☐ In case of 16S rRNA gene sequence comparison (more than 1000 nt) is mandatory between prokaryotic isolates and type strains of validly named species.
- ☐ The isolate identification was performed following the Submission guidelines (Microorganism Identification section) and recommendations published in this [Editorial](#).

### **Statistics**

- ☐ A clear experimental design with the treatments and replicates clearly described has been included.
- ☐ The F values, the degrees of freedom and the precise p values obtained have been calculated.
- ☐ The assumptions of the statistical test have been tested.
- ☒ Statistical information (number of replicates, asterisks denoting P-values, statistical tests) has been provided.

### **Suggested Reviewers**

- ☐ Suggested reviewers are from different countries and different institutions than the submitting authors.
- ☐ The reviewer candidates have a verifiable email address and affiliation.

### **Springer Nature Editorial Policies**

- ☐ The manuscript presented adheres to the Editorial Policies of Springer Nature.

**All policies, also including our preprint policy are accessible here:**

<https://www.springernature.com/gp/policies/editorial-policies>
